# Supplementary material for: The conformational polymorphism and weak interactions in solid state structures of ten new monomeric and dimeric substituted dibenzyldimethylammonium chloridopalladate salts
Source: Royal Society of Chemistry journal article supplement (doi:10.1039/b905421a), 2009-01-01
Supplement: b905421a.pdf [file b905421a.pdf]

## The conformational polymorphism and weak interactions in solid state structures of ten new monomeric and dimeric substituted dibenzyltrimethylammonium chloridopalladate salts

Anssi Peuronen, Manu Lahtinen\*, Jussi Valkonen

Department of Chemistry, University of Jyväskylä, P.O.Box 35, FIN-40014 University of Jyväskylä, Finland.

Supplementary material

S1

**Structures Report:** Compound 1

Relevant parameters

**Global Parameters**

|                         |              |                                    |                         |
|-------------------------|--------------|------------------------------------|-------------------------|
| Zero shift/ °2Theta     | 0,036(1)     | Space group (No.)                  | P2 <sub>1</sub> /c (14) |
| Profile function        | Pseudo Voigt | Lattice parameters                 |                         |
| Background              | Polynomial   | a/ Å                               | 12,239(1)               |
| R (expected)/ %         | 15,00473     | b/ Å                               | 9,4538(8)               |
| R (profile)/ %          | 10,08744     | c/ Å                               | 17,875(2)               |
| R (weighted profile)/ % | 13,16005     | alpha/ °                           | 90                      |
| GOF                     | 0,76923      | beta/ °                            | 129,745(4)              |
|                         |              | gamma/ °                           | 90                      |
|                         |              | V/ 10 <sup>6</sup> pm <sup>3</sup> | 1590,25100              |
|                         |              | Overall displacement parameter     | 6,2(3)                  |

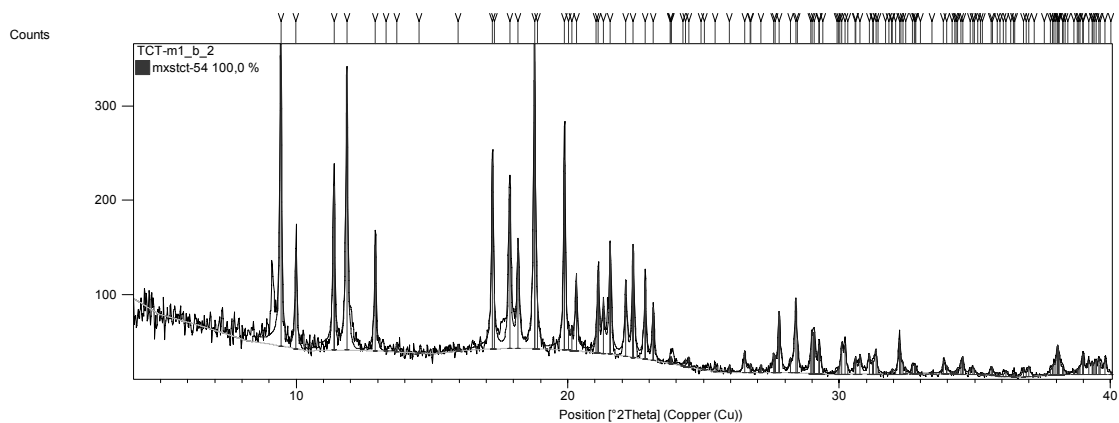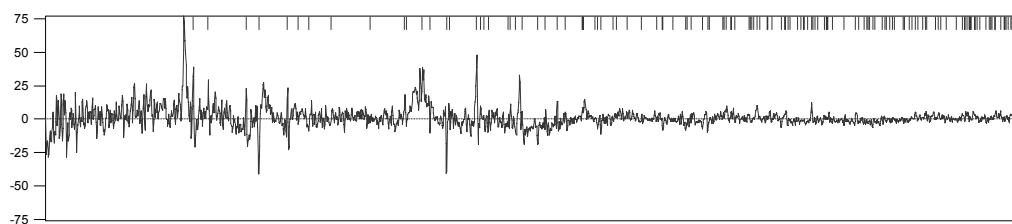

S2

**Structures Report:** Compound 2

**Relevant parameters**

**Global Parameters**

|                         |              |
|-------------------------|--------------|
| Zero shift/ °2Theta     | 0,007(3)     |
| Profile function        | Pseudo Voigt |
| Background              | Polynomial   |
| R (expected)/ %         | 4,33591      |
| R (profile)/ %          | 9,52064      |
| R (weighted profile)/ % | 12,53146     |
| GOF                     | 8,35300      |

|                                    |           |
|------------------------------------|-----------|
| Space group (No.)                  | P -1 (2)  |
| Lattice parameters                 |           |
| a/ Å                               | 8,317(2)  |
| b/ Å                               | 10,660(3) |
| c/ Å                               | 11,634(2) |
| alpha/ °                           | 107,12(1) |
| beta/ °                            | 105,60(2) |
| gamma/ °                           | 103,64(1) |
| V/ 10 <sup>6</sup> pm <sup>3</sup> | 892,08910 |
| Overall displacement parameter     | 10,0(4)   |

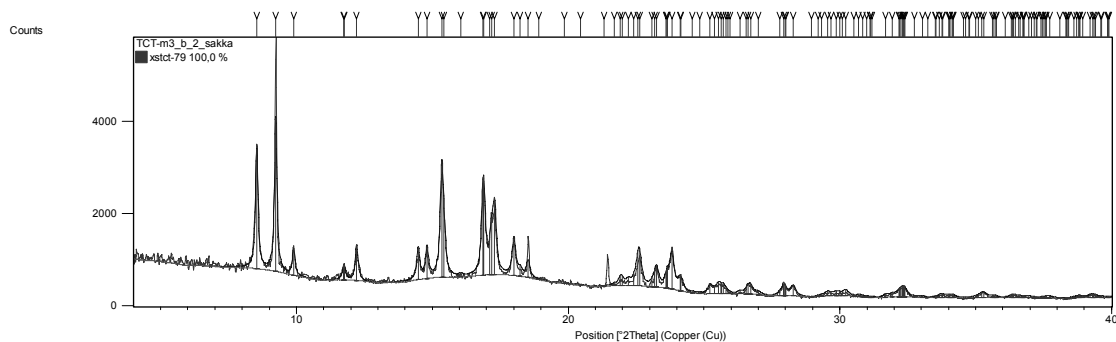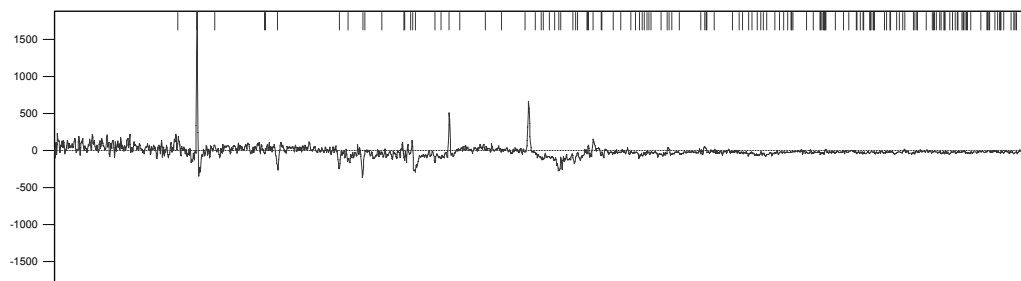

S3

**Structures Report:** Compound 3

**Relevant parameters of xstct-55**

**Global Parameters**

|                         |              |
|-------------------------|--------------|
| Zero shift/ °2Theta     | 0,0391(6)    |
| Profile function        | Pseudo Voigt |
| Background              | Polynomial   |
| R (expected)/ %         | 9,62352      |
| R (profile)/ %          | 13,67803     |
| R (weighted profile)/ % | 15,96253     |
| GOF                     | 2,75128      |

|                                    |                           |
|------------------------------------|---------------------------|
| Space group (No.)                  | P2 <sub>1</sub> /c 1 (14) |
| Lattice parameters                 |                           |
| a/ Å                               | 11,2879(8)                |
| b/ Å                               | 10,901(1)                 |
| c/ Å                               | 15,069(2)                 |
| alpha/ °                           | 90                        |
| beta/ °                            | 93,925(9)                 |
| gamma/ °                           | 90                        |
| V/ 10 <sup>6</sup> pm <sup>3</sup> | 1849,94700                |
| Overall displacement parameter     | 5,3(2)                    |

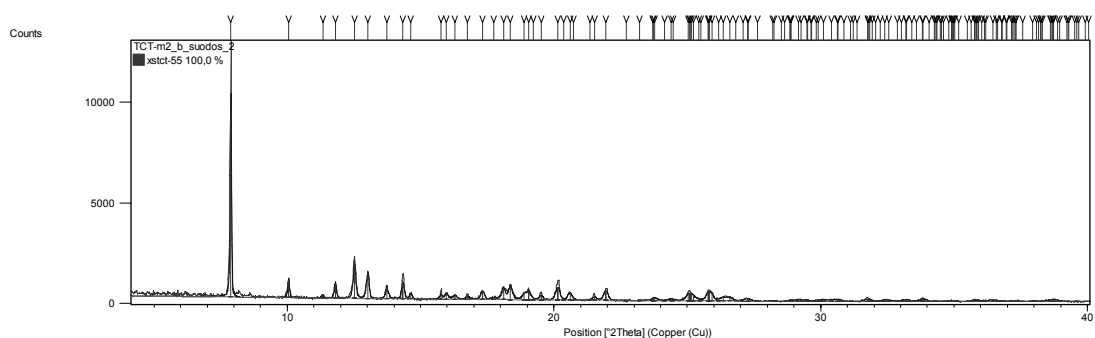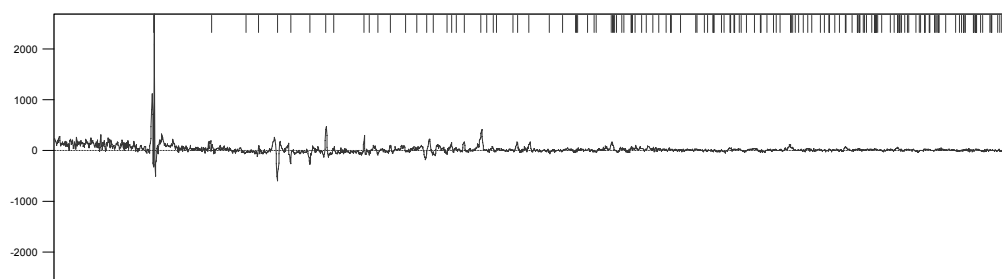

## S4

### Structures Report: Compound 4

### Relevant parameters

#### Global Parameters

|                         |              |
|-------------------------|--------------|
| Zero shift/ °2Theta     | 0,0245(8)    |
| Profile function        | Pseudo Voigt |
| Background              | Polynomial   |
| R (expected)/ %         | 10,82287     |
| R (profile)/ %          | 15,22258     |
| R (weighted profile)/ % | 21,72788     |
| GOF                     | 4,03041      |

|                                    |                         |
|------------------------------------|-------------------------|
| Space group (No.)                  | P2 <sub>1</sub> /c (14) |
| Lattice parameters                 |                         |
| a/ Å                               | 16,1425(7)              |
| b/ Å                               | 11,6792(7)              |
| c/ Å                               | 19,0958(9)              |
| alpha/ °                           | 90                      |
| beta/ °                            | 94,167(3)               |
| gamma/ °                           | 90                      |
| V/ 10 <sup>6</sup> pm <sup>3</sup> | 3590,64000              |
| Overall displacement parameter     | 7,6(4)                  |

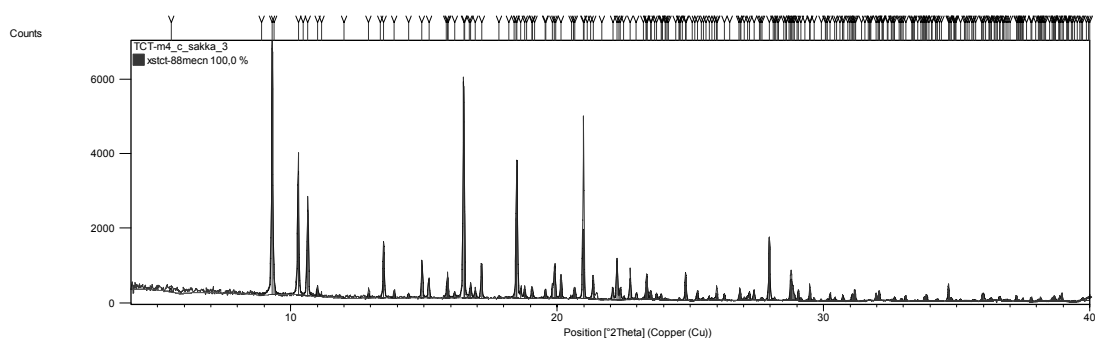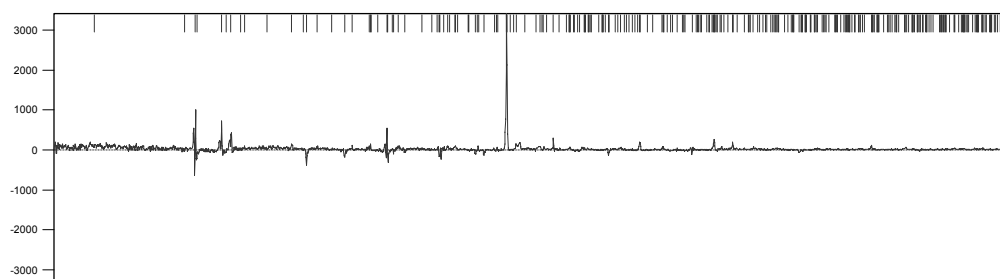

S5

**Structures Report:** Compound 5

**Relevant parameters of xstct-87**

**Global Parameters**

|                         |              |
|-------------------------|--------------|
| Zero shift/ °2Theta     | 0,0288(8)    |
| Profile function        | Pseudo Voigt |
| Background              | Polynomial   |
| R (expected)/ %         | 4,67977      |
| R (profile)/ %          | 7,85211      |
| R (weighted profile)/ % | 10,84941     |
| GOF                     | 5,37482      |

|                                    |            |
|------------------------------------|------------|
| Space group (No.)                  | P -1 (2)   |
| Lattice parameters                 |            |
| a/ Å                               | 8,6549(4)  |
| b/ Å                               | 10,6011(5) |
| c/ Å                               | 10,8874(7) |
| alpha/ °                           | 67,486(3)  |
| beta/ °                            | 74,158(4)  |
| gamma/ °                           | 78,919(2)  |
| V/ 10 <sup>6</sup> pm <sup>3</sup> | 883,41890  |
| Overall displacement parameter     | 10,0(2)    |

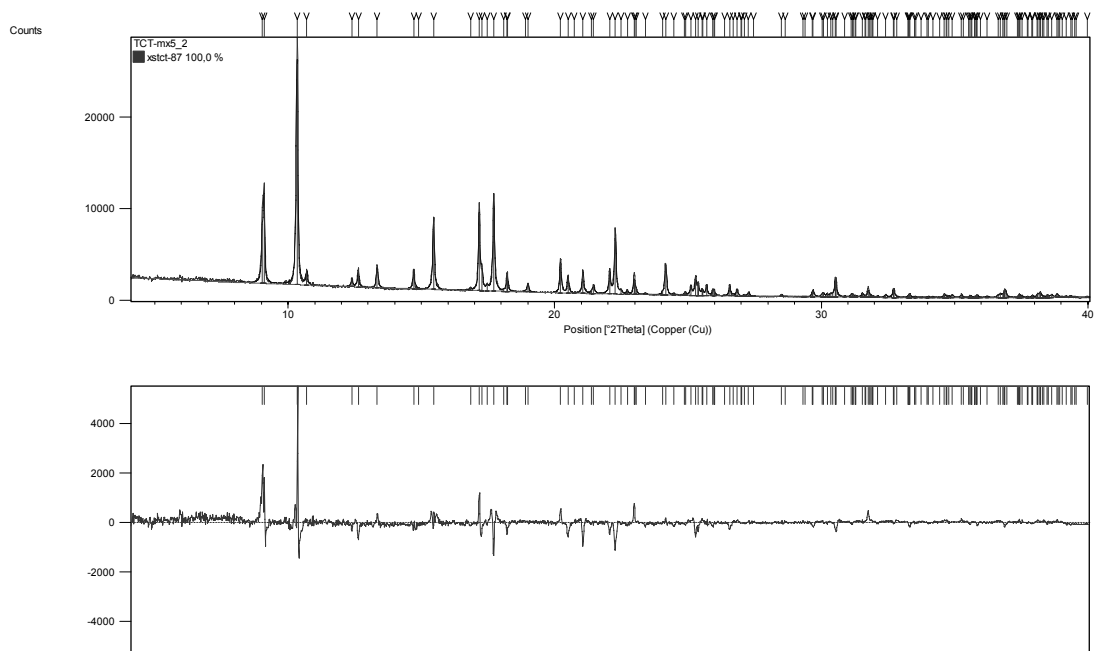

S6

**Structures Report:** Compound 6

**Relevant parameters**

**Global Parameters**

|                         |              |
|-------------------------|--------------|
| Zero shift/ °2Theta     | 0,010(2)     |
| Profile function        | Pseudo Voigt |
| Background              | Polynomial   |
| R (expected)/ %         | 8,28674      |
| R (profile)/ %          | 9,69886      |
| R (weighted profile)/ % | 12,27171     |
| GOF                     | 2,19302      |

|                                    |                         |
|------------------------------------|-------------------------|
| Space group (No.)                  | P2 <sub>1</sub> /c (14) |
| Lattice parameters                 |                         |
| a/ Å                               | 9,265(1)                |
| b/ Å                               | 13,485(2)               |
| c/ Å                               | 15,779(3)               |
| alpha/ °                           | 90                      |
| beta/ °                            | 118,23(1)               |
| gamma/ °                           | 90                      |
| V/ 10 <sup>6</sup> pm <sup>3</sup> | 1736,90800              |
| Overall displacement parameter     | 4,2(6)                  |

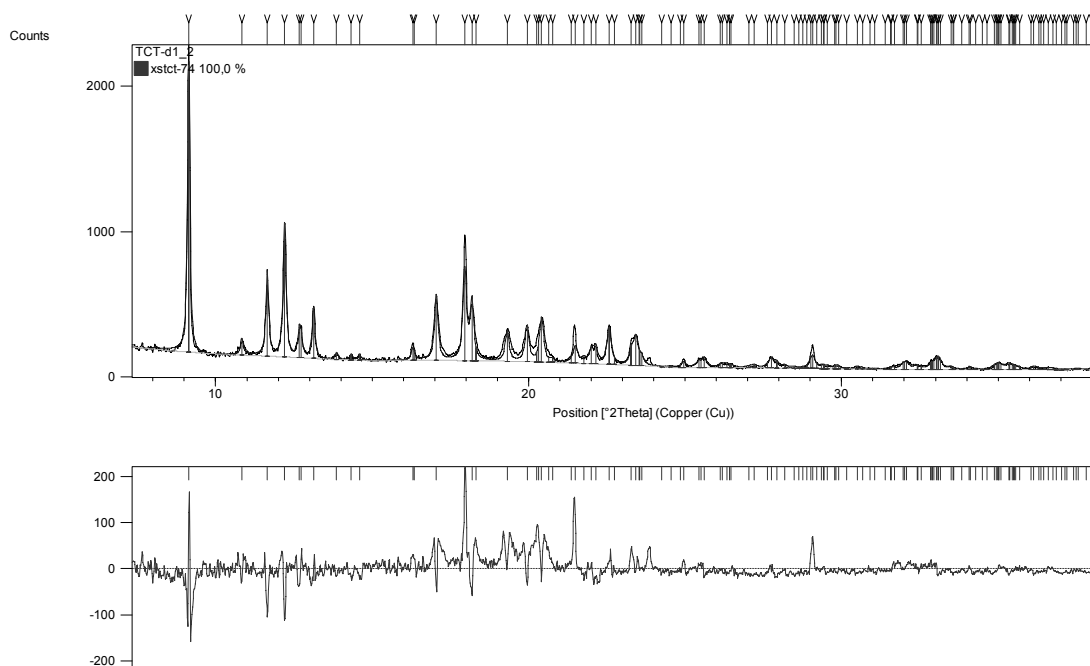

S7

**Structures Report:** Compound 7

**Relevant parameters**

**Global Parameters**

|                         |              |
|-------------------------|--------------|
| Zero shift/ °2Theta     | 0,005(2)     |
| Profile function        | Pseudo Voigt |
| Background              | Polynomial   |
| R (expected)/ %         | 6,76462      |
| R (profile)/ %          | 8,34966      |
| R (weighted profile)/ % | 11,98932     |
| GOF                     | 3,14124      |

|                                    |            |
|------------------------------------|------------|
| Space group (No.)                  | P -1 (2)   |
| Lattice parameters                 |            |
| a/ Å                               | 10,450(1)  |
| b/ Å                               | 10,420(2)  |
| c/ Å                               | 11,131(2)  |
| alpha/ °                           | 107,898(8) |
| beta/ °                            | 105,16(1)  |
| gamma/ °                           | 109,942(7) |
| V/ 10 <sup>6</sup> pm <sup>3</sup> | 989,13430  |
| Overall displacement parameter     | 10,0(3)    |

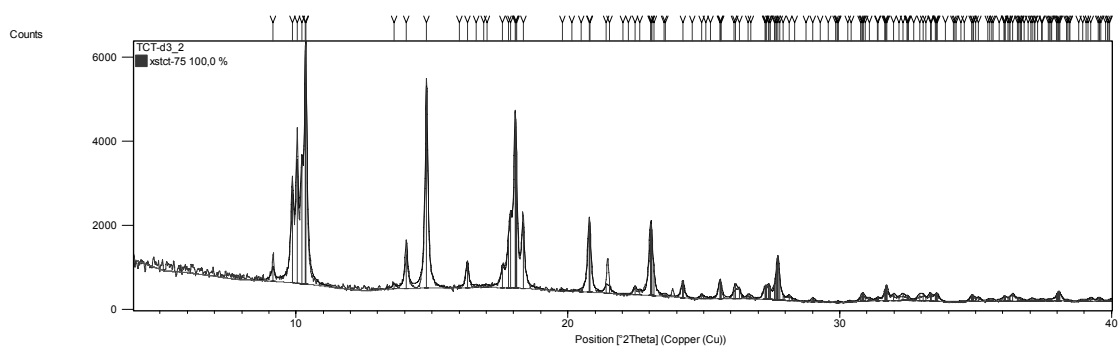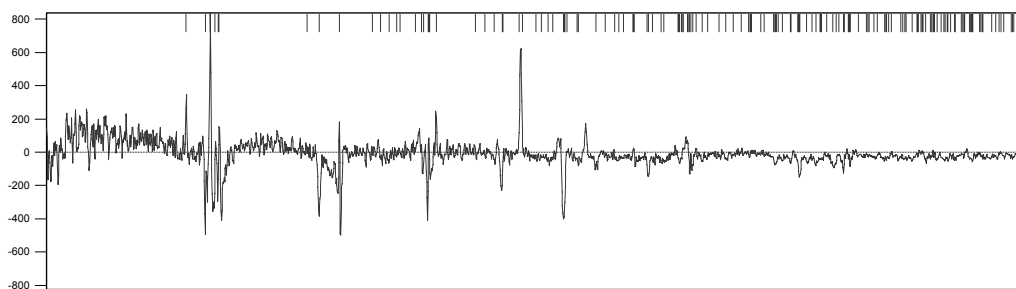

S9

**Structures Report:** Compound 9

**Relevant parameters of new**

**Global Parameters**

|                         |              |
|-------------------------|--------------|
| Zero shift/ °2Theta     | 0,0040(8)    |
| Profile function        | Pseudo Voigt |
| Background              | Polynomial   |
| R (expected)/ %         | 7,93833      |
| R (profile)/ %          | 7,90277      |
| R (weighted profile)/ % | 10,30172     |
| GOF                     | 1,68408      |

|                                    |                         |
|------------------------------------|-------------------------|
| Space group (No.)                  | P2 <sub>1</sub> /c (14) |
| Lattice parameters                 |                         |
| a/ Å                               | 9,5744(5)               |
| b/ Å                               | 15,3043(8)              |
| c/ Å                               | 15,3361(7)              |
| alpha/ °                           | 90                      |
| beta/ °                            | 119,049(3)              |
| gamma/ °                           | 90                      |
| V/ 10 <sup>6</sup> pm <sup>3</sup> | 1964,50200              |
| Overall displacement parameter     | 7,4(2)                  |

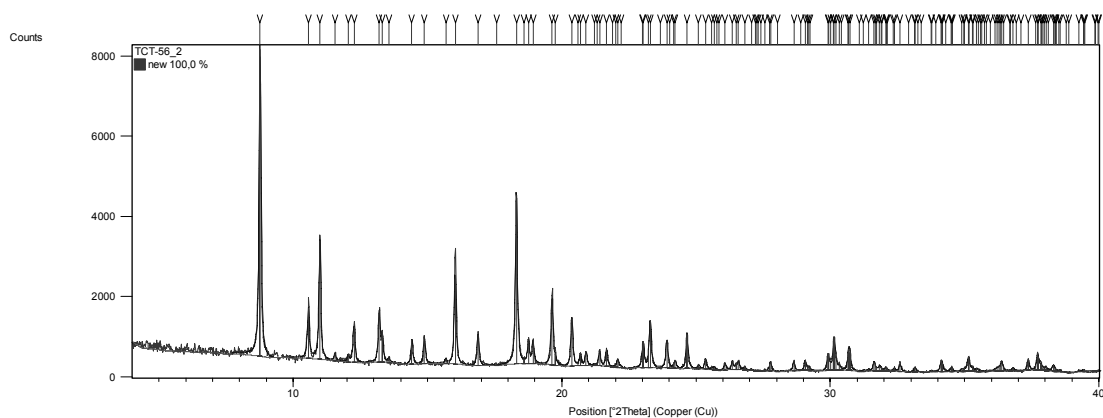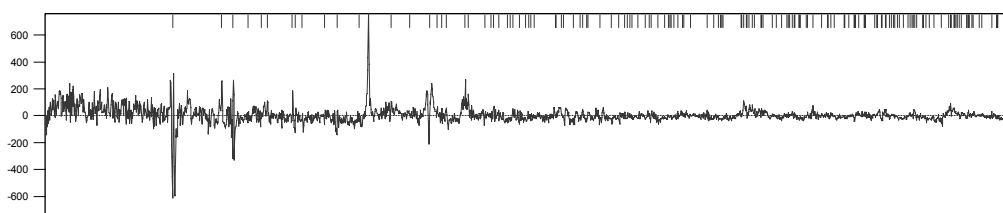



## S10

### Structures Report: Compound 10

### Relevant parameters

#### Global Parameters

|                         |              |
|-------------------------|--------------|
| Zero shift/ °2Theta     | 0,0233(6)    |
| Profile function        | Pseudo Voigt |
| Background              | Polynomial   |
| R (expected)/ %         | 13,50614     |
| R (profile)/ %          | 18,75381     |
| R (weighted profile)/ % | 24,58805     |
| GOF                     | 3,31425      |

|                                    |                         |
|------------------------------------|-------------------------|
| Space group (No.)                  | P2 <sub>1</sub> /c (14) |
| Lattice parameters                 |                         |
| a/ Å                               | 14,6148(7)              |
| b/ Å                               | 16,4540(9)              |
| c/ Å                               | 17,162(1)               |
| alpha/ °                           | 90                      |
| beta/ °                            | 104,873(4)              |
| gamma/ °                           | 90                      |
| V/ 10 <sup>6</sup> pm <sup>3</sup> | 3988,66700              |
| Overall displacement parameter     | 7,7(7)                  |

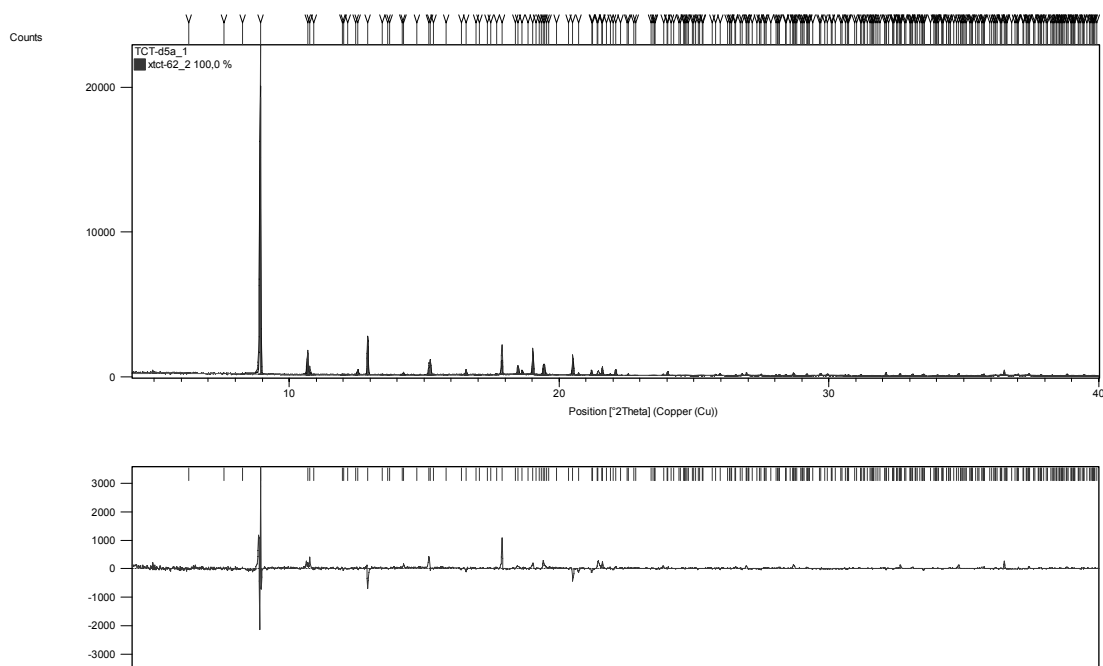

Electronic Supplementary Material for CrystEngComm  
This journal is (c) The Royal Society of Chemistry 2009

### *Optimized atomic coordinates used in DFT calculations*

==> 1\_TS.xyz <==

37

Structure 1, transition state geometry

|   |          |          |          |
|---|----------|----------|----------|
| C | -0.00670 | -0.00050 | 0.00140  |
| C | -0.00030 | 0.00100  | 1.39950  |
| C | 1.22440  | 0.00400  | 2.07400  |
| C | 2.41880  | 0.03430  | 1.36440  |
| C | 2.40100  | 0.05300  | -0.02720 |
| C | 1.18750  | 0.03010  | -0.70850 |
| C | -1.28740 | -0.04860 | 2.16330  |
| N | -1.93340 | 1.34270  | 2.54330  |
| C | -2.04420 | 1.42350  | 4.03830  |
| C | -3.34330 | 1.38460  | 1.89900  |
| C | -4.16310 | 2.61420  | 2.16350  |
| C | -4.12370 | 3.69750  | 1.27890  |
| C | -4.91630 | 4.81740  | 1.49790  |
| C | -5.76610 | 4.86420  | 2.59890  |
| C | -5.83110 | 3.78360  | 3.47300  |
| C | -5.03920 | 2.66310  | 3.25320  |
| C | -1.11600 | 2.50850  | 2.06880  |
| H | -3.48590 | 3.66110  | 0.40290  |
| H | -4.88090 | 5.64660  | 0.80300  |
| H | -6.38900 | 5.73370  | 2.76560  |
| H | -6.50910 | 3.80700  | 4.31650  |
| H | -5.12250 | 1.81490  | 3.92340  |
| H | 1.24870  | -0.03560 | 3.15760  |
| H | 3.36190  | 0.02960  | 1.89560  |
| H | 3.33160  | 0.06930  | -0.57980 |
| H | 1.17230  | 0.02190  | -1.79080 |
| H | -0.94680 | -0.04370 | -0.53800 |
| H | -1.04520 | 1.36320  | 4.46390  |
| H | -2.50780 | 2.36640  | 4.31360  |
| H | -2.64970 | 0.59420  | 4.39710  |
| H | -0.12850 | 2.45670  | 2.51690  |
| H | -1.02170 | 2.47170  | 0.98800  |
| H | -1.62080 | 3.42090  | 2.37200  |
| H | -3.84730 | 0.49420  | 2.27290  |
| H | -3.16360 | 1.25750  | 0.83240  |
| H | -2.05150 | -0.57210 | 1.59450  |
| H | -1.15490 | -0.56680 | 3.10930  |

==> 1\_twisted.xyz <==

37

Structure 1, twisted geometry

|   |          |          |          |
|---|----------|----------|----------|
| C | 0.02660  | 0.00880  | 0.00670  |
| C | 0.03970  | 0.00380  | 1.40560  |
| C | 1.24290  | -0.01200 | 2.10070  |
| C | 2.44810  | -0.03560 | 1.40570  |
| C | 2.44760  | -0.05640 | 0.01440  |
| C | 1.24420  | -0.03980 | -0.68040 |
| H | -0.89360 | -0.00830 | 1.95710  |

Electronic Supplementary Material for CrystEngComm  
This journal is (c) The Royal Society of Chemistry 2009

|   |          |          |          |
|---|----------|----------|----------|
| H | 1.23960  | -0.02090 | 3.18310  |
| H | 3.38530  | -0.05560 | 1.94720  |
| H | 3.38280  | -0.09990 | -0.52880 |
| H | 1.25610  | -0.08760 | -1.76360 |
| C | -1.27600 | -0.01890 | -0.74150 |
| N | -1.86950 | 1.35950  | -1.11260 |
| C | -3.18320 | 1.15070  | -1.91150 |
| C | -4.29920 | 0.44710  | -1.19480 |
| C | -2.12890 | 2.17480  | 0.11860  |
| C | -0.92440 | 2.11460  | -2.00140 |
| C | -5.24680 | 1.17660  | -0.46870 |
| C | -6.30550 | 0.53200  | 0.15930  |
| C | -6.43800 | -0.84950 | 0.05790  |
| C | -5.51700 | -1.58310 | -0.68340 |
| C | -4.45740 | -0.93840 | -1.31000 |
| H | -5.17320 | 2.25660  | -0.40900 |
| H | -7.03480 | 1.10870  | 0.71360  |
| H | -7.26720 | -1.35090 | 0.54050  |
| H | -5.63110 | -2.65470 | -0.78510 |
| H | -3.76300 | -1.51730 | -1.90840 |
| H | -1.37720 | 3.06870  | -2.26170 |
| H | 0.00950  | 2.27900  | -1.47230 |
| H | -0.74280 | 1.53500  | -2.90370 |
| H | -2.56750 | 3.12460  | -0.17970 |
| H | -2.81560 | 1.63780  | 0.76590  |
| H | -1.18660 | 2.34640  | 0.63010  |
| H | -1.16940 | -0.54180 | -1.69130 |
| H | -2.05170 | -0.51210 | -0.16120 |
| H | -2.88280 | 0.60290  | -2.80350 |
| H | -3.48520 | 2.15350  | -2.21110 |

==> 1\_w.xyz <==

37

Structure 1, w geometry

|   |          |          |          |
|---|----------|----------|----------|
| C | 0.00860  | 0.01840  | -0.00330 |
| C | -0.00200 | 0.00010  | 1.39560  |
| C | 1.21800  | -0.01840 | 2.08030  |
| C | 2.41970  | 0.01850  | 1.38350  |
| C | 2.41670  | 0.06160  | -0.00730 |
| C | 1.21020  | 0.05520  | -0.70030 |
| C | -1.29930 | -0.08440 | 2.14700  |
| N | -1.94700 | 1.26570  | 2.54750  |
| C | -1.02600 | 2.04410  | 3.43770  |
| C | -3.25480 | 0.91100  | 3.30030  |
| C | -4.07060 | 2.07090  | 3.79410  |
| C | -5.08810 | 2.61250  | 3.00100  |
| C | -5.87060 | 3.65900  | 3.47340  |
| C | -5.65380 | 4.16900  | 4.74980  |
| C | -4.66140 | 3.62220  | 5.55740  |
| C | -3.87900 | 2.57560  | 5.08480  |
| C | -2.25060 | 2.08220  | 1.32780  |
| H | -5.28690 | 2.20340  | 2.01690  |
| H | -6.65800 | 4.06590  | 2.85210  |
| H | -6.26860 | 4.97910  | 5.12080  |
| H | -4.50670 | 4.00030  | 6.55980  |
| H | -3.12970 | 2.13770  | 5.73450  |

Electronic Supplementary Material for CrystEngComm  
This journal is (c) The Royal Society of Chemistry 2009

|   |          |          |          |
|---|----------|----------|----------|
| H | 1.23370  | -0.08280 | 3.16240  |
| H | 3.35690  | -0.00150 | 1.92470  |
| H | 3.35290  | 0.08230  | -0.55030 |
| H | 1.20500  | 0.06380  | -1.78260 |
| H | -0.92400 | -0.01730 | -0.55490 |
| H | -0.10970 | 2.25500  | 2.89470  |
| H | -1.51560 | 2.97010  | 3.72380  |
| H | -0.80390 | 1.45350  | 4.32380  |
| H | -1.32120 | 2.29210  | 0.80700  |
| H | -2.91920 | 1.51960  | 0.68000  |
| H | -2.72680 | 3.00810  | 1.63600  |
| H | -2.93880 | 0.27640  | 4.12720  |
| H | -3.82550 | 0.30300  | 2.59960  |
| H | -2.05890 | -0.59580 | 1.55730  |
| H | -1.17240 | -0.62340 | 3.08490  |

==> 2\_TS.xyz <==

43

Structure 2, transition state geometry

|   |          |          |          |
|---|----------|----------|----------|
| C | 0.00880  | -0.00970 | 0.00720  |
| C | -0.00190 | 0.00150  | 1.40950  |
| C | 1.22330  | 0.01100  | 2.11030  |
| C | 2.40470  | 0.07530  | 1.36590  |
| C | 2.39900  | 0.11180  | -0.02180 |
| C | 1.19260  | 0.05710  | -0.71030 |
| C | -1.32680 | -0.10660 | 2.11180  |
| N | -2.10890 | 1.21760  | 2.34630  |
| C | -1.28190 | 2.16990  | 3.15660  |
| C | 1.33030  | -0.08000 | 3.61480  |
| C | -3.46290 | 0.83000  | 3.06380  |
| C | -3.76480 | 1.51850  | 4.36220  |
| C | -3.34850 | 0.89000  | 5.54310  |
| C | -3.60990 | 1.44300  | 6.78710  |
| C | -4.31600 | 2.63830  | 6.86110  |
| C | -4.75840 | 3.25530  | 5.69800  |
| C | -4.50040 | 2.71820  | 4.43420  |
| C | -5.02630 | 3.44190  | 3.21790  |
| C | -2.42560 | 1.87200  | 1.03330  |
| H | 3.35210  | 0.07900  | 1.89120  |
| H | 3.33520  | 0.15650  | -0.56350 |
| H | 1.17520  | 0.04610  | -1.79220 |
| H | -0.92710 | -0.09400 | -0.53310 |
| H | -5.33060 | 4.17230  | 5.76970  |
| H | -4.53890 | 3.08120  | 7.82350  |
| H | -3.28330 | 0.93930  | 7.68760  |
| H | -2.82580 | -0.05900 | 5.48570  |
| H | -3.01050 | 2.76710  | 1.22370  |
| H | -1.49920 | 2.13290  | 0.53040  |
| H | -2.99800 | 1.18170  | 0.41790  |
| H | -1.83540 | 3.09360  | 3.29580  |
| H | -1.06820 | 1.73190  | 4.12510  |
| H | -0.36070 | 2.36210  | 2.61330  |
| H | -2.01490 | -0.72630 | 1.53810  |
| H | -1.22300 | -0.53980 | 3.10330  |
| H | -3.39400 | -0.24150 | 3.22840  |
| H | -4.23440 | 1.00470  | 2.32000  |

Electronic Supplementary Material for CrystEngComm  
This journal is (c) The Royal Society of Chemistry 2009

|   |          |          |         |
|---|----------|----------|---------|
| H | 2.34010  | -0.37100 | 3.90000 |
| H | 1.12670  | 0.87430  | 4.10670 |
| H | 0.65310  | -0.82330 | 4.04050 |
| H | -5.80480 | 4.14750  | 3.50410 |
| H | -4.24760 | 4.02510  | 2.71610 |
| H | -5.46290 | 2.76530  | 2.48050 |

==> 2\_twisted.xyz <==

43

Structure 2, twisted geometry

|   |          |          |          |
|---|----------|----------|----------|
| C | 0.04070  | 0.00600  | 0.04520  |
| C | 0.09500  | -0.11390 | 1.45030  |
| C | 1.35360  | -0.12460 | 2.05990  |
| C | 2.52780  | -0.03920 | 1.32500  |
| C | 2.47210  | 0.03480  | -0.06220 |
| C | 1.23550  | 0.04580  | -0.68770 |
| C | -1.12570 | -0.25900 | 2.32890  |
| H | 1.40990  | -0.22050 | 3.13740  |
| H | 3.48380  | -0.05640 | 1.83270  |
| H | 3.38040  | 0.06390  | -0.64980 |
| H | 1.19570  | 0.06360  | -1.77090 |
| C | -1.25890 | -0.01730 | -0.71380 |
| N | -1.85060 | 1.35900  | -1.11050 |
| C | -3.17350 | 1.14130  | -1.89980 |
| C | -4.31560 | 0.50160  | -1.15960 |
| C | -2.08800 | 2.20120  | 0.10420  |
| C | -0.91190 | 2.09130  | -2.02460 |
| C | -5.35070 | 1.25790  | -0.56940 |
| C | -6.39170 | 0.56720  | 0.05940  |
| C | -6.43660 | -0.81930 | 0.09910  |
| C | -5.43930 | -1.56190 | -0.52280 |
| C | -4.39890 | -0.89870 | -1.15360 |
| C | -5.41820 | 2.76700  | -0.60580 |
| H | -7.19480 | 1.13590  | 0.51220  |
| H | -7.26230 | -1.31780 | 0.59100  |
| H | -5.48250 | -2.64310 | -0.53420 |
| H | -3.64480 | -1.47900 | -1.67250 |
| H | -1.36750 | 3.03840  | -2.30490 |
| H | 0.02580  | 2.26990  | -1.50770 |
| H | -0.73750 | 1.48980  | -2.91380 |
| H | -2.45880 | 3.17230  | -0.21240 |
| H | -2.81940 | 1.70980  | 0.73750  |
| H | -1.14660 | 2.31940  | 0.63340  |
| H | -1.13790 | -0.54240 | -1.66060 |
| H | -2.04720 | -0.50460 | -0.15040 |
| H | -2.87980 | 0.53100  | -2.75290 |
| H | -3.43620 | 2.13010  | -2.26750 |
| H | -0.84840 | -0.70720 | 3.28210  |
| H | -1.58830 | 0.70470  | 2.55740  |
| H | -1.89340 | -0.89590 | 1.88700  |
| H | -6.44090 | 3.09860  | -0.43190 |
| H | -4.80210 | 3.22920  | 0.16960  |
| H | -5.10880 | 3.18240  | -1.56670 |

==> 2\_w.xyz <==

43

Electronic Supplementary Material for CrystEngComm  
This journal is (c) The Royal Society of Chemistry 2009

Structure 2, w geometry

|   |          |          |          |
|---|----------|----------|----------|
| C | -0.01090 | 0.00970  | 0.00130  |
| C | 0.00640  | -0.00390 | 1.41240  |
| C | 1.23700  | -0.02150 | 2.08450  |
| C | 2.43830  | -0.09220 | 1.39700  |
| C | 2.42220  | -0.12270 | 0.00740  |
| C | 1.21300  | -0.05890 | -0.67100 |
| C | -1.24980 | 0.10290  | 2.23210  |
| N | -1.84710 | -1.22750 | 2.76700  |
| C | -2.11600 | -2.17610 | 1.63900  |
| C | -1.27210 | 0.12230  | -0.82330 |
| C | -3.16960 | -0.84500 | 3.48670  |
| C | -3.90900 | -1.95910 | 4.17480  |
| C | -4.80780 | -2.72480 | 3.41840  |
| C | -5.54460 | -3.75140 | 3.98790  |
| C | -5.40550 | -4.01150 | 5.34620  |
| C | -4.55400 | -3.23070 | 6.11550  |
| C | -3.79890 | -2.19220 | 5.56230  |
| C | -2.93500 | -1.36720 | 6.48770  |
| C | -0.89820 | -1.88540 | 3.72150  |
| H | -4.48230 | -3.41750 | 7.18010  |
| H | -5.97790 | -4.80380 | 5.81170  |
| H | -6.23300 | -4.32780 | 3.38380  |
| H | -4.94920 | -2.49860 | 2.36780  |
| H | 1.21430  | -0.04480 | -1.75410 |
| H | 3.35010  | -0.16990 | -0.54840 |
| H | 3.37560  | -0.10330 | 1.93780  |
| H | 1.25530  | 0.04310  | 3.16640  |
| H | -1.18190 | -2.36640 | 1.11800  |
| H | -2.51450 | -3.10070 | 2.04540  |
| H | -2.83660 | -1.72800 | 0.96060  |
| H | 0.00630  | -2.15690 | 3.18590  |
| H | -0.66070 | -1.19140 | 4.52290  |
| H | -1.37600 | -2.77310 | 4.12640  |
| H | -3.78460 | -0.40390 | 2.70360  |
| H | -2.88810 | -0.05720 | 4.18090  |
| H | -1.07330 | 0.69790  | 3.12710  |
| H | -2.05990 | 0.56410  | 1.67280  |
| H | -3.27090 | -1.48550 | 7.51680  |
| H | -1.88670 | -1.67620 | 6.46260  |
| H | -2.97180 | -0.29970 | 6.26270  |
| H | -1.03230 | 0.47100  | -1.82680 |
| H | -1.77980 | -0.83900 | -0.93850 |
| H | -1.99090 | 0.82920  | -0.40510 |

==> 3\_TS.xyz <==

43

Structure 3, transition state geometry

|   |          |          |          |
|---|----------|----------|----------|
| C | 0.00370  | 0.00230  | -0.00010 |
| C | 0.00160  | 0.00020  | 1.39980  |
| C | 1.22110  | -0.00340 | 2.08020  |
| C | 2.41370  | -0.04100 | 1.36630  |
| C | 2.39660  | -0.06110 | -0.02190 |
| C | 1.19050  | -0.02960 | -0.73050 |
| C | -1.29270 | 0.08440  | 2.15540  |
| N | -1.95050 | -1.26380 | 2.55130  |

Electronic Supplementary Material for CrystEngComm  
This journal is (c) The Royal Society of Chemistry 2009

|   |          |          |          |
|---|----------|----------|----------|
| C | -2.23460 | -2.07730 | 1.32310  |
| C | 1.18400  | -0.00480 | -2.23630 |
| C | -3.25900 | -0.92220 | 3.37010  |
| C | -4.55130 | -1.42070 | 2.80140  |
| C | -5.05080 | -2.67070 | 3.18170  |
| C | -6.26060 | -3.15470 | 2.68630  |
| C | -6.97100 | -2.34890 | 1.78940  |
| C | -6.49670 | -1.09830 | 1.41540  |
| C | -5.29080 | -0.62750 | 1.92280  |
| C | -6.80740 | -4.48920 | 3.11950  |
| C | -1.02850 | -2.05150 | 3.43520  |
| H | 3.33310  | -0.08250 | -0.56690 |
| H | 3.35840  | -0.04070 | 1.89490  |
| H | 1.24690  | 0.04540  | 3.16270  |
| H | -7.91630 | -2.70100 | 1.39310  |
| H | -7.07410 | -0.48250 | 0.73760  |
| H | -4.93970 | 0.36080  | 1.64720  |
| H | -1.52540 | -2.97740 | 3.71570  |
| H | -0.11240 | -2.27050 | 2.89430  |
| H | -0.80220 | -1.46910 | 4.32560  |
| H | -2.71230 | -3.00690 | 1.61640  |
| H | -2.89950 | -1.52460 | 0.66680  |
| H | -1.29120 | -2.27660 | 0.82330  |
| H | -1.15850 | 0.61510  | 3.09700  |
| H | -2.05380 | 0.60080  | 1.57240  |
| H | -3.26840 | 0.16140  | 3.45260  |
| H | -3.08850 | -1.33560 | 4.36060  |
| H | -0.93780 | 0.05160  | -0.53690 |
| H | -4.49730 | -3.27420 | 3.89440  |
| H | 1.76550  | -0.83290 | -2.64670 |
| H | 0.17190  | -0.07210 | -2.63540 |
| H | 1.62970  | 0.91960  | -2.61160 |
| H | -7.08680 | -5.09970 | 2.25860  |
| H | -6.08200 | -5.04840 | 3.71050  |
| H | -7.70520 | -4.36080 | 3.72920  |

==> 3\_twisted.xyz <==

43

Structure 3, twisted geometry

|   |          |          |          |
|---|----------|----------|----------|
| C | 0.00000  | 0.00000  | 0.00000  |
| C | 0.00000  | 0.00000  | 1.40000  |
| C | 1.22060  | 0.00000  | 2.07830  |
| C | 2.41210  | -0.03630 | 1.36240  |
| C | 2.39280  | -0.05970 | -0.02560 |
| C | 1.18560  | -0.03230 | -0.73230 |
| C | -1.29480 | 0.08640  | 2.15540  |
| N | -1.96950 | -1.25920 | 2.53190  |
| C | -3.25950 | -0.93100 | 3.22480  |
| C | 1.17650  | -0.01130 | -2.23820 |
| C | -1.03560 | -2.04790 | 3.47840  |
| C | -1.56080 | -3.36720 | 3.96960  |
| C | -2.28000 | -3.44630 | 5.16380  |
| C | -2.72100 | -4.68070 | 5.62810  |
| C | -2.44000 | -5.83690 | 4.91290  |
| C | -1.70060 | -5.79070 | 3.72590  |
| C | -1.26680 | -4.54550 | 3.27340  |

Electronic Supplementary Material for CrystEngComm  
This journal is (c) The Royal Society of Chemistry 2009

|   |          |          |          |
|---|----------|----------|----------|
| C | -1.37240 | -7.05460 | 2.97570  |
| C | -2.27320 | -2.05690 | 1.29980  |
| H | -2.78290 | -6.79370 | 5.28900  |
| H | -3.27360 | -4.74100 | 6.55710  |
| H | -2.47900 | -2.55360 | 5.74560  |
| H | 3.32860  | -0.08030 | -0.57210 |
| H | 3.35760  | -0.03300 | 1.88970  |
| H | 1.24770  | 0.04900  | 3.16060  |
| H | -3.88550 | -0.35680 | 2.54540  |
| H | -3.75970 | -1.85380 | 3.50230  |
| H | -3.04650 | -0.34300 | 4.11480  |
| H | -2.91320 | -1.46350 | 0.65040  |
| H | -1.34490 | -2.29240 | 0.78820  |
| H | -2.78380 | -2.96980 | 1.59150  |
| H | -0.84510 | -1.36980 | 4.30960  |
| H | -0.11240 | -2.17520 | 2.91880  |
| H | -1.16210 | 0.60470  | 3.10420  |
| H | -2.04800 | 0.61930  | 1.57650  |
| H | -0.66750 | -4.49820 | 2.37020  |
| H | -0.94200 | 0.04950  | -0.53610 |
| H | -2.28170 | -7.58420 | 2.68250  |
| H | -0.79720 | -6.84860 | 2.07300  |
| H | -0.78800 | -7.73690 | 3.59690  |
| H | 1.75110  | -0.84490 | -2.64730 |
| H | 0.16330  | -0.07210 | -2.63560 |
| H | 1.62840  | 0.90870  | -2.61670 |

==> 3\_w.xyz <==

43

Structure 3, w geometry

|   |          |          |          |
|---|----------|----------|----------|
| C | -0.00400 | -0.00960 | -0.00370 |
| C | -0.00180 | 0.00510  | 1.39610  |
| C | 1.21950  | 0.01980  | 2.07280  |
| C | 2.41010  | -0.01500 | 1.35520  |
| C | 2.38910  | -0.05180 | -0.03250 |
| C | 1.18060  | -0.04060 | -0.73770 |
| C | -1.29580 | 0.08340  | 2.15340  |
| N | -1.93370 | -1.26970 | 2.56070  |
| C | -2.22220 | -2.09910 | 1.34620  |
| C | 1.16930  | -0.04260 | -2.24360 |
| C | -3.24990 | -0.92080 | 3.30190  |
| C | -4.04940 | -2.08280 | 3.81610  |
| C | -3.85580 | -2.54850 | 5.12200  |
| C | -4.60930 | -3.59830 | 5.64460  |
| C | -5.58080 | -4.18080 | 4.82310  |
| C | -5.80130 | -3.71680 | 3.53330  |
| C | -5.04380 | -2.66570 | 3.02820  |
| C | -4.40350 | -4.08420 | 7.05510  |
| C | -1.01090 | -2.03160 | 3.46300  |
| H | 3.32420  | -0.07060 | -0.58000 |
| H | 3.35640  | 0.00060  | 1.88070  |
| H | 1.24790  | 0.07900  | 3.15460  |
| H | -6.18360 | -4.99530 | 5.20760  |
| H | -6.57490 | -4.16520 | 2.92300  |
| H | -5.24510 | -2.29150 | 2.03110  |
| H | -1.49620 | -2.95670 | 3.75890  |



Electronic Supplementary Material for CrystEngComm  
This journal is (c) The Royal Society of Chemistry 2009

|   |          |          |          |
|---|----------|----------|----------|
| H | -0.09060 | -2.24130 | 2.92620  |
| H | -0.79690 | -1.42860 | 4.34290  |
| H | -2.68850 | -3.02830 | 1.65960  |
| H | -2.89570 | -1.54910 | 0.69250  |
| H | -1.28840 | -2.29940 | 0.82960  |
| H | -1.16880 | 0.62450  | 3.08990  |
| H | -2.06210 | 0.58750  | 1.56610  |
| H | -3.82580 | -0.33580 | 2.58620  |
| H | -2.94600 | -0.26500 | 4.11660  |
| H | -0.94770 | 0.02560  | -0.53810 |
| H | -3.11680 | -2.07080 | 5.75680  |
| H | 1.69300  | -0.91570 | -2.63930 |
| H | 0.15330  | -0.05170 | -2.63820 |
| H | 1.67350  | 0.84220  | -2.63860 |
| H | -4.15240 | -5.14710 | 7.07180  |
| H | -3.60160 | -3.54070 | 7.55470  |
| H | -5.31250 | -3.95820 | 7.64750  |

==> 4\_TS.xyz <==

43

Structure 4, transition state geometry

|   |          |          |          |
|---|----------|----------|----------|
| C | -0.00070 | 0.00280  | -0.00250 |
| C | 0.00090  | -0.00120 | 1.39640  |
| C | 1.23360  | -0.00410 | 2.05690  |
| C | 2.42220  | 0.03150  | 1.34120  |
| C | 2.42430  | 0.05650  | -0.05650 |
| C | 1.19020  | 0.03820  | -0.71370 |
| C | -1.28430 | -0.07880 | 2.16370  |
| N | -1.93640 | 1.27380  | 2.55800  |
| C | -0.99320 | 2.07050  | 3.40960  |
| C | 3.71380  | 0.05560  | -0.83120 |
| C | -3.29300 | 0.94030  | 3.30210  |
| C | -3.42430 | 1.43860  | 4.70550  |
| C | -3.02230 | 0.64760  | 5.78520  |
| C | -3.15620 | 1.10750  | 7.08790  |
| C | -3.70610 | 2.36440  | 7.35760  |
| C | -4.12100 | 3.14510  | 6.27400  |
| C | -3.98840 | 2.69010  | 4.96980  |
| C | -3.88830 | 2.84440  | 8.77160  |
| C | -2.25180 | 2.07450  | 1.32900  |
| H | 1.27050  | -0.04960 | 3.13960  |
| H | 3.36450  | 0.02710  | 1.87580  |
| H | 1.16230  | 0.03820  | -1.79680 |
| H | -0.93840 | -0.03970 | -0.54570 |
| H | -4.34210 | 3.31130  | 4.15370  |
| H | -4.56480 | 4.11680  | 6.45540  |
| H | -2.84100 | 0.47580  | 7.90980  |
| H | -2.61350 | -0.34240 | 5.61290  |
| H | -2.72680 | 3.00430  | 1.63340  |
| H | -1.33130 | 2.28530  | 0.79240  |
| H | -2.92770 | 1.50540  | 0.69450  |
| H | -1.47540 | 2.99860  | 3.70060  |
| H | -0.73990 | 1.50440  | 4.30050  |
| H | -0.10010 | 2.27420  | 2.82630  |
| H | -2.05020 | -0.59770 | 1.58890  |
| H | -1.14800 | -0.60180 | 3.10930  |

Electronic Supplementary Material for CrystEngComm  
This journal is (c) The Royal Society of Chemistry 2009

|   |          |          |          |
|---|----------|----------|----------|
| H | -3.37520 | -0.14290 | 3.26820  |
| H | -4.07100 | 1.35900  | 2.66900  |
| H | -3.15330 | 2.39920  | 9.44250  |
| H | -3.80300 | 3.92930  | 8.83900  |
| H | -4.87990 | 2.57090  | 9.14370  |
| H | 3.61620  | 0.60350  | -1.76900 |
| H | 4.52580  | 0.50060  | -0.25590 |
| H | 4.00990  | -0.96750 | -1.08010 |

==> 4\_twisted.xyz <==

43

Structure 4, twisted geometry

|   |          |          |          |
|---|----------|----------|----------|
| C | 0.03040  | 0.02200  | -0.00860 |
| C | 0.04370  | 0.00020  | 1.38930  |
| C | 1.24340  | -0.01310 | 2.08780  |
| C | 2.47010  | -0.01980 | 1.41810  |
| C | 2.45240  | -0.01820 | 0.01990  |
| C | 1.25580  | -0.00480 | -0.68260 |
| H | -0.88910 | -0.02380 | 1.94170  |
| H | 1.22690  | -0.03220 | 3.17090  |
| C | 3.76880  | -0.07450 | 2.17550  |
| H | 3.38830  | -0.04170 | -0.52570 |
| H | 1.28050  | -0.03480 | -1.76630 |
| C | -1.26690 | -0.01060 | -0.76180 |
| N | -1.86820 | 1.36490  | -1.13690 |
| C | -3.18850 | 1.14480  | -1.92440 |
| C | -4.29740 | 0.44950  | -1.19310 |
| C | -2.12110 | 2.18560  | 0.09100  |
| C | -0.93170 | 2.11610  | -2.03620 |
| C | -5.24550 | 1.18010  | -0.46940 |
| C | -6.29730 | 0.54050  | 0.17120  |
| C | -6.45120 | -0.84730 | 0.09920  |
| C | -5.51410 | -1.57190 | -0.64310 |
| C | -4.45940 | -0.93680 | -1.28390 |
| H | -5.17640 | 2.26110  | -0.41790 |
| H | -7.01940 | 1.12960  | 0.72380  |
| C | -7.61540 | -1.53340 | 0.75970  |
| H | -5.61870 | -2.64670 | -0.73090 |
| H | -3.76760 | -1.52850 | -1.87300 |
| H | -1.38750 | 3.06800  | -2.29940 |
| H | 0.00540  | 2.28450  | -1.51400 |
| H | -0.75530 | 1.53150  | -2.93640 |
| H | -2.56550 | 3.13220  | -0.20910 |
| H | -2.80140 | 1.64970  | 0.74590  |
| H | -1.17550 | 2.36210  | 0.59460  |
| H | -1.15660 | -0.53240 | -1.71200 |
| H | -2.04340 | -0.50620 | -0.18480 |
| H | -2.89170 | 0.58710  | -2.81160 |
| H | -3.49230 | 2.14420  | -2.23400 |
| H | -7.36850 | -2.55750 | 1.04090  |
| H | -7.93890 | -0.99940 | 1.65360  |
| H | -8.46990 | -1.57810 | 0.07820  |
| H | 4.55830  | 0.46730  | 1.65350  |
| H | 3.66630  | 0.34700  | 3.17550  |
| H | 4.10320  | -1.10980 | 2.28790  |

Electronic Supplementary Material for CrystEngComm  
This journal is (c) The Royal Society of Chemistry 2009

==> 4\_w.xyz <==

43

Structure 4, w geometry

|   |          |          |          |
|---|----------|----------|----------|
| C | -0.00000 | -0.00040 | 0.00020  |
| C | 0.00010  | -0.00000 | 1.39880  |
| C | 1.23230  | 0.00040  | 2.06060  |
| C | 2.42160  | 0.03660  | 1.34630  |
| C | 2.42510  | 0.05810  | -0.05150 |
| C | 1.19190  | 0.03580  | -0.70970 |
| C | -1.28480 | -0.08020 | 2.16740  |
| N | -1.93630 | 1.27330  | 2.55640  |
| C | -1.00830 | 2.06970  | 3.42170  |
| C | 3.71610  | 0.05840  | -0.82370 |
| C | -3.23370 | 0.92460  | 3.33290  |
| C | -4.04750 | 2.08640  | 3.81830  |
| C | -3.84580 | 2.61900  | 5.09580  |
| C | -4.62540 | 3.67000  | 5.55790  |
| C | -5.64260 | 4.21660  | 4.76990  |
| C | -5.85540 | 3.66730  | 3.50210  |
| C | -5.07840 | 2.61630  | 3.03560  |
| C | -6.51120 | 5.33010  | 5.28810  |
| C | -2.26050 | 2.06840  | 1.32880  |
| H | 1.26870  | -0.04500 | 3.14340  |
| H | 3.36330  | 0.03440  | 1.88210  |
| H | 1.16530  | 0.03310  | -1.79280 |
| H | -0.93680 | -0.04630 | -0.54410 |
| H | -5.29110 | 2.19640  | 2.05870  |
| H | -6.64910 | 4.05920  | 2.87730  |
| H | -4.45050 | 4.06400  | 6.55190  |
| H | -3.08500 | 2.20120  | 5.74590  |
| H | -2.73840 | 2.99610  | 1.62890  |
| H | -1.33930 | 2.27470  | 0.79220  |
| H | -2.93440 | 1.49180  | 0.69910  |
| H | -1.49930 | 2.99730  | 3.70020  |
| H | -0.77160 | 1.49400  | 4.31370  |
| H | -0.10010 | 2.27620  | 2.86340  |
| H | -2.05060 | -0.60360 | 1.59640  |
| H | -1.14380 | -0.60290 | 3.11260  |
| H | -2.90190 | 0.30410  | 4.16440  |
| H | -3.80880 | 0.30230  | 2.64840  |
| H | -5.97240 | 5.96050  | 5.99590  |
| H | -6.87910 | 5.95970  | 4.47760  |
| H | -7.38340 | 4.92460  | 5.80920  |
| H | 3.60450  | 0.55490  | -1.78790 |
| H | 4.51220  | 0.55700  | -0.27020 |
| H | 4.04560  | -0.96610 | -1.01930 |

==> 5\_twisted.xyz <==

43

Structure 5, twisted geometry

|   |          |          |          |
|---|----------|----------|----------|
| C | -0.01640 | 0.01450  | 0.02270  |
| C | -0.05500 | -0.04700 | 1.42030  |
| C | 1.11900  | -0.07420 | 2.16330  |
| C | 2.35140  | -0.05040 | 1.51840  |
| C | 2.40460  | -0.01240 | 0.12880  |
| C | 1.22950  | 0.01360  | -0.61340 |

Electronic Supplementary Material for CrystEngComm  
This journal is (c) The Royal Society of Chemistry 2009

|   |          |          |          |
|---|----------|----------|----------|
| H | -1.00900 | -0.09140 | 1.93340  |
| H | 1.07120  | -0.12710 | 3.24340  |
| H | 3.26670  | -0.07780 | 2.09570  |
| H | 3.36080  | -0.01770 | -0.37850 |
| H | 1.29230  | 0.01110  | -1.69470 |
| C | -1.30040 | -0.02010 | -0.76270 |
| N | -1.88140 | 1.34240  | -1.21120 |
| C | -3.21590 | 1.08170  | -1.94990 |
| C | -4.30400 | 0.39260  | -1.16990 |
| C | -2.09460 | 2.20400  | 0.03080  |
| C | -0.92780 | 2.06600  | -2.15770 |
| C | -5.23170 | 1.12130  | -0.41790 |
| C | -6.26550 | 0.47610  | 0.25050  |
| C | -6.39470 | -0.90660 | 0.16730  |
| C | -5.49420 | -1.64090 | -0.59760 |
| C | -4.46080 | -0.99480 | -1.26510 |
| H | -5.16630 | 2.20110  | -0.36680 |
| H | -6.97850 | 1.05470  | 0.82380  |
| H | -7.20400 | -1.40780 | 0.68260  |
| H | -5.60380 | -2.71420 | -0.68580 |
| H | -3.78260 | -1.57610 | -1.87970 |
| H | -1.37540 | 3.03770  | -2.34830 |
| H | -0.01530 | 2.22320  | -1.58530 |
| C | -0.62680 | 1.38060  | -3.48290 |
| C | -2.57840 | 3.62830  | -0.19880 |
| H | -1.13730 | 2.21510  | 0.54570  |
| H | -1.18890 | -0.60130 | -1.67490 |
| H | -2.09030 | -0.47480 | -0.17160 |
| H | -2.94790 | 0.48070  | -2.81380 |
| H | -3.54250 | 2.05600  | -2.30720 |
| H | -2.81640 | 4.04790  | 0.78020  |
| H | -1.81790 | 4.27000  | -0.64110 |
| H | -3.48360 | 3.69270  | -0.80140 |
| H | -2.80010 | 1.65210  | 0.64850  |
| H | 0.14420  | 1.97000  | -3.98210 |
| H | -0.23520 | 0.37020  | -3.37400 |
| H | -1.48630 | 1.35210  | -4.15100 |

==> 5\_w.xyz <==

43

Structure 5, w geometry

|   |          |          |          |
|---|----------|----------|----------|
| C | -0.05190 | -0.33380 | 0.06230  |
| C | 0.00790  | 0.00650  | 1.41800  |
| C | 1.26430  | 0.25030  | 1.98620  |
| C | 2.41670  | 0.19840  | 1.21110  |
| C | 2.33740  | -0.11720 | -0.14140 |
| C | 1.10040  | -0.39290 | -0.71260 |
| C | -1.25630 | -0.00350 | 2.24060  |
| N | -1.85390 | 1.37050  | 2.62810  |
| C | -1.98880 | 2.27030  | 1.40080  |
| C | -2.92020 | 1.79120  | 0.29990  |
| C | -3.23090 | 1.07980  | 3.27190  |
| C | -3.94650 | 2.24220  | 3.91360  |
| C | -4.00620 | 2.32680  | 5.30870  |
| C | -4.70700 | 3.35100  | 5.93460  |
| C | -5.36700 | 4.30850  | 5.17290  |

Electronic Supplementary Material for CrystEngComm  
This journal is (c) The Royal Society of Chemistry 2009

|   |          |          |          |
|---|----------|----------|----------|
| C | -5.33810 | 4.22430  | 3.78470  |
| C | -4.64270 | 3.19550  | 3.16040  |
| C | -0.94640 | 2.12100  | 3.60140  |
| C | -0.57640 | 1.39990  | 4.88680  |
| H | 3.37930  | 0.38750  | 1.66890  |
| H | 3.23680  | -0.16470 | -0.74190 |
| H | 1.03150  | -0.66560 | -1.75790 |
| H | -1.00260 | -0.58390 | -0.39290 |
| H | 1.36070  | 0.46150  | 3.04290  |
| H | -1.11440 | -0.52680 | 3.18280  |
| H | -2.04710 | -0.51690 | 1.69880  |
| H | -2.61930 | 0.83860  | -0.12880 |
| H | -2.87550 | 2.52940  | -0.50280 |
| H | -3.96110 | 1.71910  | 0.61000  |
| H | -0.97740 | 2.38050  | 1.01490  |
| H | -2.31030 | 3.23710  | 1.78190  |
| H | -0.05420 | 2.37380  | 3.03260  |
| H | -1.47350 | 3.04540  | 3.82830  |
| H | 0.00790  | 0.49550  | 4.72680  |
| H | 0.04330  | 2.08240  | 5.47130  |
| H | -1.43890 | 1.15150  | 5.50000  |
| H | -3.04290 | 0.30570  | 4.01220  |
| H | -3.82620 | 0.63410  | 2.47900  |
| H | -4.66900 | 3.13420  | 2.08060  |
| H | -5.87240 | 4.95050  | 3.18560  |
| H | -5.91550 | 5.10600  | 5.65760  |
| H | -4.74600 | 3.39290  | 7.01550  |
| H | -3.52580 | 1.57170  | 5.91920  |
